# Supplementary material
Source: PubMed Central journal article supplement (PMC7081752)
Supplement: jama-322-2191-s001.pdf [file jama-322-2191-s001.pdf]

## Supplementary Online Content

Damrauer SM, Chaudhary K, Cho JH, et al. Association of the V122I hereditary transthyretin amyloidosis genetic variant with heart failure among individuals of African or Hispanic/Latino ancestry. *JAMA*. doi:10.1001/jama.2019.17935

**eMethods.** Illumina Global Screening Array Genotyping and Quality Control

**eTable 1.** List of CPT (Current Procedural Terminology), Diagnosis and Procedure Codes to Identify Evaluation for Hereditary Transthyretin (TTR) Amyloid Cardiomyopathy (hATTR-CM) and Diagnosis of Amyloid

**eTable 2.** Carrier Rates of *TTR* V122I by Ancestry Group

**eTable 3.** Carrier Counts and Rates of *TTR* V122I by 154 Countries/Regions of Origin

**eTable 4.** Sex-Stratified Analysis of Prevalent Heart Failure or Cardiomyopathy in PMBB

**eTable 5.** Age-Stratified Analysis of Prevalent Heart Failure or Cardiomyopathy Among Male Participants in PMBB

**eTable 6.** Clinically Obtained Echocardiographic Characteristics of Participants by *TTR* V122I Carrier Status in PMBB

**eTable 7.** Association of *TTR* V122I Carrier Status With Clinically Obtained Transthoracic Echocardiographic Parameters in PMBB

**eTable 8.** Clinically Obtained Echocardiographic Characteristics of Participants With Heart Failure or Cardiomyopathy by *TTR* V122I Carrier Status in PMBB

**eTable 9.** Association of *TTR* V122I Carrier Status With Clinically Obtained Transthoracic Echocardiographic Parameters in Participants With Heart Failure or Cardiomyopathy in PMBB

**eTable 10.** Number and Percentage of Participants With Left Ventricular Hypertrophy Among BioMe Participants (Self-Reported African and Hispanic/Latino Ancestries) Without Heart Failure (total N=4,094)

**eTable 11.** Genetic Association of *TTR* V122I on Left Ventricular (LV) Hypertrophy Among Individuals Without Heart Failure in BioMe

**eTable 12.** Genetic Association of *TTR* V122I With Diastolic Intraventricular Septal Thickness Among Individuals Without Heart Failure in BioMe

**eTable 13.** Genetic Association of *TTR* V122I With Additional Echocardiographic Parameters Among Individuals Without Heart Failure in BioMe

**eTable 14.** Characteristics of *TTR* V122I Carriers With Heart Failure That Underwent Detailed Chart Review

**eFigure 1.** Prevalence of Clinically Diagnosed Heart Failure or Cardiomyopathy by Age and Sex in *TTR* V122I Carriers in PMBB

**eFigure 2.** Cumulative Prevalence of Clinically Diagnosed Heart Failure or Cardiomyopathy by Age in *TTR* V122I Carriers in PMBB

**eFigure 3.** Ancestry-Specific Association of *TTR* V122I Carrier Status With Prevalent Heart Failure in BioMe

**eFigure 4.** Genetic Association Results of Transthyretin (*TTR*) V122I on Left Ventricular Hypertrophy Among BioMe Participants Without Heart Failure

**eFigure 5.** Genetic Association Results of Transthyretin (*TTR*) V122I on Diastolic Intraventricular Septal Thickness Among BioMe Participants Without Heart Failure

This supplementary material has been provided by the authors to give readers additional information about their work.

## **Regeneron Genetics Center Banner Author List and Contribution Statements**

All authors are listed in alphabetical order.

### **RGC Management and Leadership Team**

Goncalo Abecasis, Ph.D., Aris Baras, M.D., Michael Cantor, M.D., Giovanni Coppola, M.D., Aris Economides, Ph.D., John D. Overton, Ph.D., Jeffrey G. Reid, Ph.D., Alan Shuldiner, M.D.

Contribution: All authors contributed to securing funding, study design and oversight, and review and interpretation of data and results. All authors reviewed and contributed to the final version of the manuscript.

### **Sequencing and Lab Operations**

Christina Beechert, Caitlin Forsythe, M.S., Erin D. Fuller, Zhenhua Gu, M.S., Michael Lattari, Alexander Lopez, M.S., John D. Overton, Ph.D., Thomas D. Schleicher, M.S., Maria Sotiropoulos Padilla, M.S., Karina Toledo, Louis Widom, Sarah E. Wolf, M.S., Manasi Pradhan, M.S., Kia Manoochchri, Ricardo H. Ulloa.

Contribution: C.B., C.F., K.T., A.L., and J.D.O. performed and are responsible for sample genotyping. C.B, C.F., E.D.F., M.L., M.S.P., K.T., L.W., S.E.W., A.L., and J.D.O. performed and are responsible for exome sequencing. T.D.S., Z.G., A.L., and J.D.O. conceived and are responsible for laboratory automation. M.P., K.M., R.U., and J.D.O are responsible for sample tracking and the library information management system.

### **Genome Informatics**

Xiaodong Bai, Ph.D., Suganthi Balasubramanian, Ph.D., Leland Barnard, Ph.D., Andrew Blumenfeld, Yating Chai, Ph.D., Gisu Eom, Lukas Habegger, Ph.D., Young Hahn, Alicia Hawes, B.S., Shareef Khalid, Jeffrey G. Reid, Ph.D., Evan K. Maxwell, Ph.D., John Penn, M.S., Jeffrey C. Staples, Ph.D., Ashish Yadav, M.S.

Contribution: X.B., A.H., Y.C., J.P., and J.G.R. performed and are responsible for analysis needed to produce exome and genotype data. G.E., Y.H., and J.G.R. provided compute infrastructure development and operational support. S.K., S.B., and J.G.R. provide variant and gene annotations and their functional interpretation of variants. E.M., L.B., J.S., A.B., A.Y., L.H., J.G.R. conceived and are responsible for creating, developing, and deploying analysis platforms and computational methods for analyzing genomic data.

### **Clinical Informatics**

Nilanjana Banerjee, Ph.D., Michael Cantor, M.D.

Contribution: All authors contributed to the development and validation of clinical phenotypes used to identify study subjects and (when applicable) controls.

### **Analytical Genomics and Data Science**

Goncalo Abecasis, Ph.D., Amy Damask, Ph.D., Lauren Gurski, Alexander Li, Ph.D., Nan Lin, Ph.D., Daren Liu, Jonathan Marchini Ph.D., Anthony Marcketta, Shane McCarthy, Ph.D., Colm O’Dushlaine, Ph.D., Charles Paulding, Ph.D., Claudia Schurmann, Ph.D., Dylan Sun, Tanya Teslovich, Ph.D., Cristopher Van Hout, Ph.D., Bin Ye

Contribution: Development of statistical analysis plans. QC of genotype and phenotype files and generation of analysis ready datasets. Development of statistical genetics pipelines and tools and use thereof in generation of the association results. QC, review and interpretation of result. Generation and formatting of results for manuscript figures. Contributions to the final version of the manuscript.

### **Therapeutic Area Genetics**

Jan Freudenberg, M.D., Nehal Gosalia, Ph.D., Claudia Gonzaga-Jauregui, Ph.D., Julie Horowitz, Ph.D., Kavita Praveen, Ph.D.

Contribution: Development of study design and analysis plans. Development and QC of phenotype definitions. QC, review, and interpretation of association results. Contributions to the final version of the manuscript.

### **Planning, Strategy, and Operations**

Paloma M. Guzzardo, Ph.D., Marcus B. Jones, Ph.D., Lyndon J. Mitnaul, Ph.D.

Contribution: All authors contributed to the management and coordination of all research activities, planning and execution. All authors managed the review of data and results for the manuscript. All authors contributed to the review process for the final version of the manuscript.

## eMethods. Illumina Global Screening Array Genotyping and Quality Control

Bead studio files were converted to PLINK format by Genome Studio v2.0 (Illumina, Inc., San Diego, CA) and mapped to the GRCh37 reference genome. Both datasets were quality checked to retain high-quality samples and variants in the datasets. The QC steps were performed using PLINK v1.9. We applied quality control thresholds of 95 % for marker call rate and 90% for sample call rates. We also removed any samples with sex errors. Next, we merged these two datasets to identify any related samples. PLINK IBD check was performed on LD pruned merged data. We applied a graph-based algorithm on all pairs of samples with  $\hat{\pi} > 0.1875$  to generate a dataset of unrelated individuals. The most connected sample in the graph was removed in order to retain more samples.

Principal component analyses using smartpca module of Eigensoft package was performed on the merged dataset of unrelated individuals. PCA was performed by merging 1000 Genomes data with our data in order to project eigenvectors on 1000 Genomes dataset. Next, we performed quadratic discriminant analyses (QDA) to label samples by their genetically informed ancestry. For QDA, 1000 genomes super-population labels were used as training set to identify labels for PMBB dataset. PMBB GSA merged dataset consist of 45% AFR and 47% EUR samples. The table below shows the percent of samples for each label of genetically informed ancestry:

| GIA   | Percent |
|-------|---------|
| AFR   | 45.1    |
| AMR   | 4.3     |
| EAS   | 0.3     |
| EUR   | 46.9    |
| Other | 3.0     |
| SAS   | 0.3     |

**eTable 1. List of CPT (Current Procedural Terminology), Diagnosis and Procedure Codes to Identify Evaluation for Hereditary Transthyretin (TTR) Amyloid Cardiomyopathy (hATTR-CM) and Diagnosis of Amyloid.**

| <b>Diagnosis</b>                                    | <b>ICD/CPT Code</b>                                                          | <b>Definition</b>                                                                                                                                                                                                                                                                                                                         |
|-----------------------------------------------------|------------------------------------------------------------------------------|-------------------------------------------------------------------------------------------------------------------------------------------------------------------------------------------------------------------------------------------------------------------------------------------------------------------------------------------|
| <b>Amyloidosis</b>                                  | E85; E85.0; E85.1, E85.2; E85.3; E85.4; E85.8; E85.81; E85.82; E85.89; E85.9 | Amyloidosis; Non-neuropathic hereditary amyloidosis; Neuropathic hereditary amyloidosis; Hereditary amyloidosis, unspecified; Secondary systemic amyloidosis; Organ-limited amyloidosis; Other amyloidosis; Light chain (AL) amyloidosis; Wild-type transthyretin-related (ATTR) amyloidosis; Other amyloidosis; Amyloidosis, unspecified |
| <b>Fat Pad Biopsy</b>                               | 10021; 11101                                                                 | Fine needle aspiration surgical procedures; Biopsy procedures on the skin                                                                                                                                                                                                                                                                 |
| <b>Technetium 99m pyrophosphate cardiac imaging</b> | 78803; 78800                                                                 | Technetium 99m pyrophosphate cardiac imaging                                                                                                                                                                                                                                                                                              |

**eTable 2. Carrier Rates of *TTR* V122I by Ancestry Group.**

|                       | <b>PMBB</b>               |                                      |
|-----------------------|---------------------------|--------------------------------------|
| <b>Ancestry group</b> | <b>Total participants</b> | <b><i>TTR</i> Val122Ile carriers</b> |
| African               | 5,737                     | 190 (3.3%)                           |
|                       |                           |                                      |
|                       | <b>BioMe</b>              |                                      |
| <b>Ancestry group</b> | <b>Total participants</b> | <b><i>TTR</i> Val122Ile carriers</b> |
| African               | 6,609                     | 211 (3.2%)                           |
| Hispanic / Latino     | 9,006                     | 114 (1.31%)                          |
| European              | 8,710                     | 4 (0.05%)                            |
| Other                 | 2,747                     | 7 (0.25%)                            |

**eTable 3. Carrier Counts and Rates of TTR V122I by 154 Countries/Regions of Origin.**

| Continent       | Country      | Total Individuals | Rare Variant Carriers | Carrier Rate |
|-----------------|--------------|-------------------|-----------------------|--------------|
| Africa          |              |                   |                       |              |
|                 | Gambia       | 5                 | 2                     | 40%          |
|                 | West Africa  | 10                | 1                     | 10%          |
|                 | Ghana        | 42                | 4                     | 9.5%         |
|                 | Nigeria      | 31                | 3                     | 9.7%         |
|                 | Ivory Coast  | 25                | 2                     | 8.0%         |
|                 | Africa       | 18                | 1                     | 5.6%         |
|                 | Guinea       | 20                | 1                     | 5.0%         |
|                 | Senegal      | 46                | 2                     | 4.3%         |
|                 | Liberia      | 11                | 0                     | 0            |
|                 | South Africa | 18                | 0                     | 0            |
|                 | Mali         | 9                 | 0                     | 0            |
|                 | Egypt        | 68                | 0                     | 0            |
|                 | Zimbabwe     | 5                 | 0                     | 0            |
|                 | Sierra Leone | 12                | 0                     | 0            |
|                 | Kenya        | 9                 | 0                     | 0            |
|                 | Morocco      | 20                | 0                     | 0            |
|                 | Ethiopia     | 8                 | 0                     | 0            |
|                 | Cameroon     | 6                 | 0                     | 0            |
|                 | Botswana     | 1                 | 0                     | 0            |
|                 | Sudan        | 3                 | 0                     | 0            |
|                 | Mauritania   | 1                 | 0                     | 0            |
|                 | Togo         | 3                 | 0                     | 0            |
|                 | Angola       | 1                 | 0                     | 0            |
|                 | Jordan       | 5                 | 0                     | 0            |
|                 | Uganda       | 4                 | 0                     | 0            |
|                 | Burkina Faso | 1                 | 0                     | 0            |
|                 | Zambia       | 1                 | 0                     | 0            |
|                 | Algeria      | 1                 | 0                     | 0            |
|                 | Libya        | 2                 | 0                     | 0            |
|                 | Tunisia      | 2                 | 0                     | 0            |
| Central America |              |                   |                       |              |
|                 | St. Maarten  | 3                 | 1                     | 33%          |
|                 | St. Croix    | 3                 | 1                     | 33%          |
|                 | Bahamas      | 11                | 2                     | 18%          |
|                 | Belize       | 39                | 3                     | 7.7%         |
|                 | Honduras     | 128               | 9                     | 7.0%         |
|                 | St. Lucia    | 16                | 1                     | 6.2%         |
|                 |              |                   |                       |              |

| Continent     | Country                                          | Total Individuals | Rare Variant Carriers | Carrier Rate |
|---------------|--------------------------------------------------|-------------------|-----------------------|--------------|
|               | Virgin Islands (U.S. or British)                 | 17                | 1                     | 5.9%         |
|               | St. Thomas                                       | 24                | 1                     | 4.2%         |
|               | Costa Rica                                       | 25                | 1                     | 4.0%         |
|               | Panama                                           | 64                | 2                     | 3.1%         |
|               | Jamaica                                          | 324               | 4                     | 2.5%         |
|               | Dominican Republic                               | 1,678             | 34                    | 2.0%         |
|               | Trinidad & Tobago                                | 183               | 4                     | 2.2%         |
|               | El Salvador                                      | 60                | 1                     | 1.7%         |
|               | Haiti                                            | 128               | 2                     | 1.6%         |
|               | Puerto Rico                                      | 2,296             | 30                    | 1.3%         |
|               | Cuba                                             | 142               | 2                     | 1.4%         |
|               | Anguilla                                         | 1                 | 0                     | 0            |
|               | Guatemala                                        | 66                | 0                     | 0            |
|               | St. Kitts & Nevis                                | 14                | 0                     | 0            |
|               | Antigua & Barbuda                                | 32                | 0                     | 0            |
|               | Dominica                                         | 6                 | 0                     | 0            |
|               | Grenada                                          | 28                | 0                     | 0            |
|               | Nicaragua                                        | 24                | 0                     | 0            |
|               | Aruba                                            | 2                 | 0                     | 0            |
|               | St. Vincent & the Grenadines                     | 20                | 0                     | 0            |
|               | West Indies                                      | 8                 | 0                     | 0            |
|               | Curacao                                          | 3                 | 0                     | 0            |
|               | Montserrat                                       | 5                 | 0                     | 0            |
|               | Barbados                                         | 72                | 0                     | 0            |
| North America |                                                  |                   |                       |              |
|               | <b>USA</b>                                       | 17,099            | 212                   | 1.2%         |
|               | <i>African Ancestry (AA)</i>                     | 5,314             | 168                   | 3.2%         |
|               | <i>Hispanic/Latino Ancestry (HA)</i>             | 3,313             | 33                    | 1.0%         |
|               | <i>European Ancestry (EA)</i>                    | 7,340             | 4                     | 0.054%       |
|               | <i>East &amp; Southeast Asian Ancestry (ESA)</i> | 183               | 0                     | 0            |
|               | <i>Native American Ancestry (NA)</i>             | 73                | 1                     | 1.4%         |
|               | <i>Other Ancestry (OA)*</i>                      | 786               | 6                     | 0.76%        |
|               | Mexico                                           | 287               | 1                     | 0.35%        |
|               | Canada                                           | 91                | 0                     | 0            |
|               | Bermuda                                          | 6                 | 0                     | 0            |
|               | Iceland                                          | 7                 | 0                     | 0            |
|               |                                                  |                   |                       |              |



| Continent     | Country        | Total Individuals | Rare Variant Carriers | Carrier Rate |
|---------------|----------------|-------------------|-----------------------|--------------|
| South America |                |                   |                       |              |
|               | Venezuela      | 47                | 1                     | 2.1%         |
|               | Guyana         | 244               | 1                     | 0.41%        |
|               | Ecuador        | 378               | 1                     | 0.26%        |
|               | Argentina      | 58                | 0                     | 0            |
|               | Peru           | 109               | 0                     | 0            |
|               | Brazil         | 102               | 0                     | 0            |
|               | Colombia       | 224               | 0                     | 0            |
|               | Chile          | 35                | 0                     | 0            |
|               | South America  | 2                 | 0                     | 0            |
|               | Bolivia        | 14                | 0                     | 0            |
|               | Paraguay       | 3                 | 0                     | 0            |
|               | Uruguay        | 9                 | 0                     | 0            |
| Europe        |                |                   |                       |              |
|               | Czech Republic | 24                | 0                     | 0            |
|               | Italy          | 142               | 0                     | 0            |
|               | Spain          | 50                | 0                     | 0            |
|               | Romania        | 41                | 0                     | 0            |
|               | Hungary        | 28                | 0                     | 0            |
|               | Ireland        | 58                | 0                     | 0            |
|               | Kosovo         | 2                 | 0                     | 0            |
|               | France         | 54                | 0                     | 0            |
|               | Scotland       | 12                | 0                     | 0            |
|               | Estonia        | 4                 | 0                     | 0            |
|               | Greece         | 64                | 0                     | 0            |
|               | Austria        | 13                | 0                     | 0            |
|               | Sweden         | 12                | 0                     | 0            |
|               | Belgium        | 12                | 0                     | 0            |
|               | United Kingdom | 111               | 0                     | 0            |
|               | Moldova        | 14                | 0                     | 0            |
|               | Portugal       | 18                | 0                     | 0            |
|               | Germany        | 111               | 0                     | 0            |
|               | Poland         | 97                | 0                     | 0            |
|               | Ukraine        | 79                | 0                     | 0            |
|               | Finland        | 3                 | 0                     | 0            |
|               | Croatia        | 15                | 0                     | 0            |
|               | Netherlands    | 15                | 0                     | 0            |
|               | Malta          | 5                 | 0                     | 0            |
|               | Latvia         | 9                 | 0                     | 0            |
|               | Montenegro     | 3                 | 0                     | 0            |
|               | Belarus        | 10                | 0                     | 0            |
|               | Slovenia       | 6                 | 0                     | 0            |

| Continent   | Country              | Total Individuals | Rare Variant Carriers | Carrier Rate |
|-------------|----------------------|-------------------|-----------------------|--------------|
|             | Bulgaria             | 13                | 0                     | 0            |
|             | Albania              | 16                | 0                     | 0            |
|             | Bosnia & Herzegovina | 4                 | 0                     | 0            |
|             | Macedonia            | 2                 | 0                     | 0            |
|             | Scandinavia          | 1                 | 0                     | 0            |
|             | Serbia               | 6                 | 0                     | 0            |
|             | Switzerland          | 13                | 0                     | 0            |
|             | Armenia              | 3                 | 0                     | 0            |
|             | Denmark              | 4                 | 0                     | 0            |
|             | Norway               | 3                 | 0                     | 0            |
|             | Lithuania            | 1                 | 0                     | 0            |
|             | Yugoslavia           | 8                 | 0                     | 0            |
| Middle East |                      |                   |                       |              |
|             | Israel               | 89                | 0                     | 0            |
|             | Saudi Arabia         | 5                 | 0                     | 0            |
|             | Yemen                | 18                | 0                     | 0            |
|             | Iran                 | 34                | 0                     | 0            |
|             | Lebanon              | 17                | 0                     | 0            |
|             | Syria                | 9                 | 0                     | 0            |
|             | Iraq                 | 5                 | 0                     | 0            |
|             | United Arab Emirates | 2                 | 0                     | 0            |
|             | Bahrain              | 1                 | 0                     | 0            |
| Asia        |                      |                   |                       |              |
|             | Philippines          | 213               | 0                     | 0            |
|             | Uzbekistan           | 13                | 0                     | 0            |
|             | Taiwan               | 26                | 0                     | 0            |
|             | Pakistan             | 76                | 0                     | 0            |
|             | Russia               | 155               | 0                     | 0            |
|             | China                | 173               | 0                     | 0            |
|             | India                | 215               | 0                     | 0            |
|             | Korea                | 66                | 0                     | 0            |
|             | Sri Lanka            | 8                 | 0                     | 0            |
|             | Bangladesh           | 153               | 0                     | 0            |
|             | Nepal                | 12                | 0                     | 0            |
|             | Turkey               | 28                | 0                     | 0            |
|             | Hong Kong            | 24                | 0                     | 0            |
|             | Indonesia            | 5                 | 0                     | 0            |
|             | Cambodia             | 4                 | 0                     | 0            |
|             | Japan                | 82                | 0                     | 0            |
|             | Cyprus               | 5                 | 0                     | 0            |
|             | Malaysia             | 8                 | 0                     | 0            |

| <b>Continent</b> | <b>Country</b> | <b>Total Individuals</b> | <b>Rare Variant Carriers</b> | <b>Carrier Rate</b> |
|------------------|----------------|--------------------------|------------------------------|---------------------|
|                  | Vietnam        | 12                       | 0                            | 0                   |
|                  | Thailand       | 12                       | 0                            | 0                   |
|                  | Georgia        | 3                        | 0                            | 0                   |
|                  | Laos           | 1                        | 0                            | 0                   |
|                  | Afghanistan    | 7                        | 0                            | 0                   |
|                  | Burma          | 1                        | 0                            | 0                   |
|                  | Singapore      | 4                        | 0                            | 0                   |
|                  | Tibet          | 2                        | 0                            | 0                   |
| Australia        |                |                          |                              |                     |
|                  | Australia      | 23                       | 0                            | 0                   |
|                  | New Zealand    | 5                        | 0                            | 0                   |
| Unknown          |                |                          |                              |                     |
|                  | Unknown        | 35                       | 0                            | 0                   |

Participants with self-report country/region of origin from United States of America (USA) were categorized into six additional self-report ancestry groups of African Ancestry (AA), Hispanic/Latino Ancestry (HA), European Ancestry (EA), East & Southeast Asian Ancestry (ESA), Native American Ancestry (NA) and Other Ancestry (OA)\*. The OA is miscellaneous ancestry.

**eTable 4. Sex-Stratified Analysis of Prevalent Heart Failure or Cardiomyopathy in PMBB.**

| Model | Covariates                                 | Male |          |         | Female |           |         | Interaction |          |         |
|-------|--------------------------------------------|------|----------|---------|--------|-----------|---------|-------------|----------|---------|
|       |                                            | OR   | 95%CI    | p-value | OR     | 95%CI     | p-value | ROR         | 95%CI    | p-value |
| 1     | V122I variant carrier status + age + PC1-5 | 2.7  | 1.6, 4.5 | <0.001  | 0.92   | 0.46, 1.9 | 0.81    | 2.9         | 1.2, 7.0 | 0.02    |
| 2     | Model 1 + hypertension                     | 2.5  | 1.4, 4.3 | 0.001   | 0.90   | 0.44, 1.8 | 0.76    | 2.8         | 1.1, 6.8 | 0.03    |
| 3     | Model 2 + MI/coronary revascularization    | 2.5  | 1.4, 4.5 | 0.002   | 0.85   | 0.41, 1.8 | 0.66    | 3.0         | 1.2, 7.5 | 0.02    |

PC – principal component; MI – myocardial infarction; OR – odds ratio; CI – confidence interval; ROR – relative odds ratio

**eTable 5. Age-Stratified Analysis of Prevalent Heart Failure or Cardiomyopathy Among Male Participants in PMBB.**

| Age Category         | n   | OR  | 95%CI     | P-value | Interaction* |            |            |
|----------------------|-----|-----|-----------|---------|--------------|------------|------------|
|                      |     |     |           |         | OR           | 95%CI      | P-value    |
| 50 to <60 years old  | 575 | 1.6 | 0.63, 3.9 | 0.33    | <i>ref</i>   | <i>ref</i> | <i>ref</i> |
| 60 to < 70 years old | 659 | 3.4 | 1.3, 9.5  | 0.02    | 2.2          | 0.57, 8.7  | 0.25       |
| ≥ 70 years old       | 521 | 3.1 | 1.2, 8.3  | 0.02    | 2.0          | 0.52, 7.6  | 0.31       |

\*Compared to youngest age category.

n – sample size; OR – odds ratio; CI – confidence interval;

ref – reference category

**eTable 6. Clinically Obtained Echocardiographic Characteristics of Participants by *TTR* V122I Carrier Status in PMBB.**

| Characteristic                                   | Non-Carriers      | Carriers          | P-value | Adjusted $\beta$ -coefficient * | Adjusted P-value* |
|--------------------------------------------------|-------------------|-------------------|---------|---------------------------------|-------------------|
| Participants with echocardiogram– no.            | 1562              | 56                | —       | —                               | —                 |
| Number of Echocardiograms – median               | 2 (1, 4)          | 2 (1, 3)          | 0.55    | —                               | —                 |
| LV ejection fraction                             |                   |                   |         |                                 |                   |
| No. patients with data                           | 1562 (100%)       | 56 (100%)         | 1       |                                 |                   |
| Median (IQR)                                     | 60 (45, 65)       | 55 (39, 65)       | 0.04    | -0.04 (-0.16, 0.08)             | 0.5               |
| Left atrial volume index — mL/m <sup>2</sup>     |                   |                   |         |                                 |                   |
| No. patients with data                           | 838 (52%)         | 31 (55%)          | 0.89    |                                 |                   |
| Median (IQR)                                     | 32 (24, 42)       | 28 (23, 45)       | 0.24    | 0.14 (-0.02, 0.29)              | 0.08              |
| Interventricular septum diastolic thickness – mm |                   |                   |         |                                 |                   |
| No. patients with data                           | 1490 (95.3%)      | 55 (98.2%)        | 0.51    |                                 |                   |
| Median (IQR)                                     | 11 (10, 13)       | 12 (11, 14)       | 0.01    | 0.08 (0.03, 0.14)               | 0.02              |
| LV posterior wall diastolic thickness – mm       |                   |                   |         |                                 |                   |
| No. patients with data                           | 1488 (95.2%)      | 55 (98.2%)        | 0.51    |                                 |                   |
| Median (IQR)                                     | 11 (10, 12)       | 12 (11, 14)       | 0.002   | 0.1 (0.05, 0.14)                | <0.001            |
| LV end diastolic diameter – mm                   |                   |                   |         |                                 |                   |
| No. patients with data                           | 1425 (92.2%)      | 51 (91.1%)        | 1       |                                 |                   |
| Median (IQR)                                     | 46 (41, 52)       | 46 (41, 52)       | 0.70    | -0.01 (-0.06, 0.04)             | 0.62              |
| Relative wall thickness                          |                   |                   |         |                                 |                   |
| No. patients with data                           | 1420 (90.9%)      | 51 (91.1%)        | 1       |                                 |                   |
| Median (IQR)                                     | 0.48 (0.40, 0.56) | 0.49 (0.43, 0.63) | 0.09    | 0.04 (0.01, 0.06)               | 0.003             |
| LV Mass – g                                      |                   |                   |         |                                 |                   |
| No. patients with data                           | 1419 (90.8%)      | 51 (91.1%)        | 1       |                                 |                   |
| Median (IQR)                                     | 189 (147, 242)    | 206 (165, 292)    | 0.02    | 0.11 (0.01, 0.20)               | 0.03              |

LV – left ventricular; IQR: interquartile range

\* Age, sex, and principal components (PC) 1-5 adjusted effect estimate (95% confidence interval), and p-value for the effect of *TTR* V122I carrier status on natural log transformed echo parameter

**eTable 7. Association of TTR V122I Carrier Status With Clinically Obtained Transthoracic Echocardiographic Parameters in PMBB.**

| Characteristic                                     | Adjusted $\beta$ -coefficient | Std. Error | P-value |
|----------------------------------------------------|-------------------------------|------------|---------|
| <b>LVEF</b>                                        |                               |            |         |
| Model 0                                            | -0.069                        | 0.062      | 0.26    |
| Model 1                                            | -0.044                        | 0.061      | 0.46    |
| Model 2                                            | -0.046                        | 0.061      | 0.45    |
| Model 3                                            | -0.032                        | 0.061      | 0.60    |
| <b>Left atrial volume index</b>                    |                               |            |         |
| Model 0                                            | 0.129                         | 0.078      | 0.10    |
| Model 1                                            | 0.135                         | 0.077      | 0.08    |
| Model 2                                            | 0.129                         | 0.076      | 0.09    |
| Model 3                                            | 0.119                         | 0.077      | 0.12    |
| <b>Interventricular septum diastolic thickness</b> |                               |            |         |
| Model 0                                            | 0.092                         | 0.027      | <0.001  |
| Model 1                                            | 0.084                         | 0.027      | 0.002   |
| Model 2                                            | 0.078                         | 0.027      | 0.003   |
| Model 3                                            | 0.077                         | 0.027      | 0.004   |
| <b>LV posterior wall diastolic thickness</b>       |                               |            |         |
| Model 0                                            | 0.103                         | 0.024      | <0.001  |
| Model 1                                            | 0.095                         | 0.024      | <0.001  |
| Model 2                                            | 0.089                         | 0.024      | <0.001  |
| Model 3                                            | 0.088                         | 0.024      | <0.001  |
| <b>LV end diastolic diameter</b>                   |                               |            |         |
| Model 0                                            | 0.005                         | 0.026      | 0.86    |
| Model 1                                            | -0.012                        | 0.024      | 0.62    |
| Model 2                                            | -0.014                        | 0.024      | 0.57    |
| Model 3                                            | -0.017                        | 0.024      | 0.48    |
| <b>Log Relative wall thickness</b>                 |                               |            |         |
| Model 0                                            | 0.036                         | 0.013      | 0.006   |
| Model 1                                            | 0.038                         | 0.013      | 0.003   |
| Model 2                                            | 0.037                         | 0.013      | 0.004   |
| Model 3                                            | 0.038                         | 0.013      | 0.003   |
| <b>LV mass</b>                                     |                               |            |         |
| Model 0                                            | 0.143                         | 0.053      | 0.007   |
| Model 1                                            | 0.106                         | 0.049      | 0.03    |
| Model 2                                            | 0.094                         | 0.048      | 0.05    |
| Model 3                                            | 0.089                         | 0.048      | 0.06    |

Model 0: TTR V122I carrier status

Model 1: TTR V122I carrier status + principal component (PC) 1-5 + age + sex

Model 2: Model 1 + hypertension

Model 3: Model 2 + myocardial infarction or revascularization

Effect estimates and standard errors are presented on the  $\ln(x+1)$  scale. LV – left ventricular; LVEF – left ventricular (LV) ejection fraction

**eTable 8. Clinically Obtained Echocardiographic Characteristics of Participants With Heart Failure or Cardiomyopathy by TTR V122I Carrier Status in PMBB.**

| Characteristic                              | Non-Carriers      | Carriers          | P-value |
|---------------------------------------------|-------------------|-------------------|---------|
| Participants with echocardiogram– no.       | 785               | 39                |         |
| Number of Echocardiograms – median          | 3 (2,6)           | 2 (1,4)           | 0.01    |
| LV ejection fraction                        |                   |                   |         |
| No. patients with data                      | 785 (100%)        | 39 (100%)         | 1       |
| Median — percent                            | 50 (35, 35)       | 50 (35, 53)       | 0.89    |
| Left atrial volume index                    |                   |                   |         |
| No. patients with data                      | 482 (61%)         | 21 (54%)          | 0.40    |
| Median — mL/m <sup>2</sup>                  | 36 (28, 48)       | 38 (28, 55)       | 0.86    |
| Interventricular septum diastolic thickness |                   |                   |         |
| No. patients with data                      | 759 (96.7%)       | 38 (97.4%)        | 1       |
| Median — mm                                 | 11 (10, 13)       | 12 (11, 15)       | 0.009   |
| LV posterior wall diastolic thickness       |                   |                   |         |
| No. patients with data                      | 758 (96.7%)       | 38 (97.4%)        | 1       |
| Median — mm                                 | 11 (10, 13)       | 12 (11, 14)       | 0.003   |
| LV end diastolic diameter – mm              |                   |                   |         |
| No. patients with data                      | 728 (92.7%)       | 35 (89%)          | 0.52    |
| Median — mm                                 | 49 (43, 56)       | 48 (43, 54)       | 0.33    |
| Relative wall thickness                     |                   |                   |         |
| No. patients with data                      | 725 (92.3%)       | 35 (90%)          | 1       |
| Median — mm                                 | 0.45 (0.37, 0.55) | 0.51 (0.39, 0.65) | 0.03    |
| LV Mass                                     |                   |                   |         |
| No. patients with data                      | 725 (92.3%)       | 35 (90%)          | 1       |
| Median — g                                  | 213 (169, 273)    | 231 (179, 302)    | 0.09    |

LV – left ventricular



**eTable 9. Association of TTR V122I Carrier Status With Clinically Obtained Transthoracic Echocardiographic Parameters in Participants With Heart Failure or Cardiomyopathy in PMBB.**

| Characteristic                                     | Adjusted $\beta$ -coefficient | Std. Error | P-value |
|----------------------------------------------------|-------------------------------|------------|---------|
| <b>LVEF</b>                                        |                               |            |         |
| Model 0                                            | 0.015                         | 0.084      | 0.86    |
| Model 1                                            | 0.074                         | 0.082      | 0.37    |
| Model 2                                            | 0.068                         | 0.082      | 0.40    |
| Model 3                                            | 0.072                         | 0.082      | 0.38    |
| <b>Left atrial volume index</b>                    |                               |            |         |
| Model 0                                            | 0.063                         | 0.090      | 0.48    |
| Model 1                                            | 0.060                         | 0.091      | 0.51    |
| Model 2                                            | 0.069                         | 0.091      | 0.45    |
| Model 3                                            | 0.058                         | 0.091      | 0.52    |
| <b>Interventricular septum diastolic thickness</b> |                               |            |         |
| Model 0                                            | 0.115                         | 0.034      | 0.001   |
| Model 1                                            | 0.105                         | 0.034      | 0.002   |
| Model 2                                            | 0.101                         | 0.034      | 0.003   |
| Model 3                                            | 0.102                         | 0.034      | 0.003   |
| <b>LV posterior wall diastolic thickness</b>       |                               |            |         |
| Model 0                                            | 0.122                         | 0.029      | <0.001  |
| Model 1                                            | 0.114                         | 0.030      | <0.001  |
| Model 2                                            | 0.111                         | 0.029      | <0.001  |
| Model 3                                            | 0.110                         | 0.029      | <0.001  |
| <b>LV end diastolic diameter</b>                   |                               |            |         |
| Model 0                                            | -0.035                        | 0.033      | 0.30    |
| Model 1                                            | -0.071                        | 0.031      | 0.02    |
| Model 2                                            | -0.071                        | 0.031      | 0.02    |
| Model 3                                            | -0.072                        | 0.031      | 0.02    |
| <b>Log Relative wall thickness</b>                 |                               |            |         |
| Model 0                                            | 0.058                         | 0.016      | <0.001  |
| Model 1                                            | 0.067                         | 0.016      | <0.001  |
| Model 2                                            | 0.066                         | 0.016      | <0.001  |
| Model 3                                            | 0.067                         | 0.016      | <0.001  |
| <b>LV mass</b>                                     |                               |            |         |
| Model 0                                            | 0.117                         | 0.063      | 0.06    |
| Model 1                                            | 0.040                         | 0.058      | 0.49    |
| Model 2                                            | 0.038                         | 0.057      | 0.51    |
| Model 3                                            | 0.037                         | 0.058      | 0.52    |

Model 0: TTR V122I carrier status

Model 1: TTR V122I carrier status + principal component (PC) 1-5 + age + sex

Model 2: Model 1 + hypertension

Model 3: Model 2 + myocardial infarction or revascularization

Effect estimates and standard errors are presented on the  $\ln(x+1)$  scale. LV – left ventricular; LVEF – left ventricular (LV) ejection fraction

**eTable 10. Number and Percentage of Participants With Left Ventricular Hypertrophy Among BioMe Participants (Self-Reported African and Hispanic/Latino Ancestries) Without Heart Failure (total N=4,094).**

| <b>Echo</b>                  | <b>Type</b>            | <b>N (%)</b> |
|------------------------------|------------------------|--------------|
| Left ventricular hypertrophy | concentric hypertrophy | 809 (20)     |
|                              | localized hypertrophy  | 236 (5.8)    |
|                              | not assessed           | 2,768 (68)   |
|                              | not present            | 281 (6.9)    |

**eTable 11. Genetic Association of *TTR* V122I on Left Ventricular (LV) Hypertrophy Among Individuals Without Heart Failure in BioMe.**

| Age Group               | Cohort | Beta  | SE   | P-value              | OR   | 95%<br>Upper CI | 95%<br>Lower CI | Non-Carrier<br>No LVH | Carrier<br>No LVH | Non-Carrier<br>LVH | Carrier<br>LVH |
|-------------------------|--------|-------|------|----------------------|------|-----------------|-----------------|-----------------------|-------------------|--------------------|----------------|
| <b>&gt;65</b>           |        |       |      |                      |      |                 |                 |                       |                   |                    |                |
|                         | AA     | 0.2   | 0.43 | 0.64                 | 1.2  | 0.52            | 2.8             | 430                   | 13                | 266                | 11             |
|                         | HA     | -0.32 | 0.67 | 0.64                 | 0.73 | 0.16            | 2.4             | 806                   | 10                | 317                | 3              |
|                         | Meta   | 0.049 | 0.36 | 0.89                 | 1.1  | 0.52            | 2.1             | 1,236                 | 23                | 583                | 14             |
| <b>&gt;45 &amp; ≤65</b> |        |       |      |                      |      |                 |                 |                       |                   |                    |                |
|                         | AA     | 0.19  | 0.5  | 0.7                  | 1.2  | 0.43            | 3.1             | 574                   | 13                | 222                | 7              |
|                         | HA     | -0.28 | 1.1  | 0.8                  | 0.76 | 0.039           | 4.6             | 762                   | 7                 | 174                | 1              |
|                         | Meta   | 0.11  | 0.45 | 0.8                  | 1.1  | 0.46            | 2.7             | 1,336                 | 20                | 396                | 8              |
| <b>≤45</b>              |        |       |      |                      |      |                 |                 |                       |                   |                    |                |
|                         | AA     | 2.7   | 0.85 | 1.4×10 <sup>-3</sup> | 15   | 3               | 93              | 189                   | 3                 | 18                 | 5              |
|                         | HA*    | 0.18  | 2    | 1                    | 1.2  | 0.0033          | 28              | 240                   | 2                 | 21                 | 0              |
|                         | Meta   | 2.3   | 0.78 | 2.9×10 <sup>-3</sup> | 10   | 2.2             | 47              | 429                   | 5                 | 39                 | 5              |

\*Firth Logistic Regression; LVH – left ventricular hypertrophy; SE – standard error; OR – odds ratio; CI – confidence interval; AA – African Ancestry; HA – Hispanic/Latino Ancestry; Meta – meta-analysis

**eTable 12. Genetic Association of *TTR* V122I With Diastolic Intraventricular Septal Thickness Among Individuals Without Heart Failure in BioMe.**

| Age Group | Cohort | Beta    | SE    | <i>P</i> -value | 95% Lower CI | 95% Upper CI | N     |
|-----------|--------|---------|-------|-----------------|--------------|--------------|-------|
| >65       |        |         |       |                 |              |              |       |
|           | AA     | -0.0036 | 0.039 | 0.9             | -0.08        | 0.072        | 715   |
|           | HA     | -0.033  | 0.046 | 0.5             | -0.12        | 0.057        | 1,120 |
|           | Meta   | -0.016  | 0.03  | 0.6             | -0.074       | 0.042        | 1,835 |
| 45< & ≤65 |        |         |       |                 |              |              |       |
|           | AA     | 0.0087  | 0.039 | 0.8             | -0.068       | 0.086        | 814   |
|           | HA     | -0.0021 | 0.058 | 1.0             | -0.12        | 0.11         | 927   |
|           | Meta   | 0.0053  | 0.033 | 0.9             | -0.058       | 0.069        | 1,741 |
| ≤45       |        |         |       |                 |              |              |       |
|           | AA     | 0.17    | 0.063 | 0.008           | 0.044        | 0.29         | 214   |
|           | HA     | -0.022  | 0.12  | 0.9             | -0.25        | 0.21         | 262   |
|           | Meta   | 0.12    | 0.056 | 0.02            | 0.016        | 0.23         | 476   |

SE – standard error; CI – Confidence Interval; N – sample size; AA –African Ancestry, HA –

Hispanic/Latino Ancestry; Meta – meta-analysis

**eTable 13. Genetic Association of TTR V122I With Additional Echocardiographic Parameters Among Individuals Without Heart Failure in BioMe.**

| Characteristic                                          |                        | Non-Carriers | Carriers     | P-value | Adjusted $\beta$ -coefficient*         | Adjusted P* |
|---------------------------------------------------------|------------------------|--------------|--------------|---------|----------------------------------------|-------------|
| <b>LV ejection fraction</b>                             |                        |              |              |         |                                        |             |
| >65                                                     | No. patients with data | 1770 (97%)   | 37 (100%)    | 0.63    |                                        |             |
|                                                         | Median (IQR)           | 62 (58, 66)  | 60 (57, 65)  | 0.53    | $1.8 \times 10^{-5}$ (-0.066, 0.066)   | 1           |
| >45 & ≤65                                               | No. patients with data | 1707 (98%)   | 29 (100%)    | 1       |                                        |             |
|                                                         | Median (IQR)           | 62 (57, 65)  | 61 (55, 64)  | 0.39    | $3.6 \times 10^{-3}$ (-0.060, 0.068)   | 0.9         |
| ≤45                                                     | No. patients with data | 459 (97%)    | 10 (100%)    | 0.94    |                                        |             |
|                                                         | Median (IQR)           | 61 (57, 65)  | 66 (64, 69)  | 0.0023  | 0.11 (0.002, 0.210)                    | 0.05        |
| <b>Left atrial volume index — mL/m<sup>2</sup></b>      |                        |              |              |         |                                        |             |
| >65                                                     | No. patients with data | 797 (44%)    | 18 (49%)     | 0.65    |                                        |             |
|                                                         | Median (IQR)           | 25 (17, 32)  | 23 (17, 32)  | 0.55    | -0.083 (-0.30, 0.14)                   | 0.5         |
| >45 & ≤65                                               | No. patients with data | 832 (48%)    | 16 (55%)     | 0.53    |                                        |             |
|                                                         | Median (IQR)           | 24 (18, 31)  | 22 (15, 28)  | 0.18    | -0.11 (-0.34, 0.11)                    | 0.3         |
| ≤45                                                     | No. patients with data | 218 (46%)    | 4 (40%)      | 1       |                                        |             |
|                                                         | Median (IQR)           | 24 (19, 30)  | 26 (25, 26)  | 0.8     | 0.0081 (-0.005, 0.02)                  | 0.2         |
| <b>Interventricular septum diastolic thickness – mm</b> |                        |              |              |         |                                        |             |
| >65                                                     | No. patients with data | 1799 (98%)   | 36 (97%)     | 0.47    |                                        |             |
|                                                         | Median (IQR)           | 11 (10, 12)  | 11 (9.5, 12) | 0.95    | -0.016 (-0.074, 0.042)                 | 0.6         |
| >45 & ≤65                                               | No. patients with data | 1713 (98%)   | 28 (97%)     | 0.45    |                                        |             |
|                                                         | Median (IQR)           | 10 (9, 12)   | 11 (9.8, 12) | 0.42    | 0.0053 (-0.058, 0.069)                 | 0.9         |
| ≤45                                                     | No. patients with data | 466 (99%)    | 10 (100%)    | 0.98    |                                        |             |
|                                                         | Median (IQR)           | 9 (8, 10)    | 11 (10, 12)  | 0.002   | 0.12 (0.016, 0.23)                     | 0.02        |
| <b>Characteristic</b>                                   |                        |              |              |         |                                        |             |
| Characteristic                                          |                        | Non-Carriers | Carriers     | P-value | Adjusted $\beta$ -coefficient*         | P*          |
| <b>LV posterior wall diastolic thickness – mm</b>       |                        |              |              |         |                                        |             |
| >65                                                     | No. patients with data | 1796 (98%)   | 36 (97%)     | 0.5     |                                        |             |
|                                                         | Median (IQR)           | 10 (9, 11)   | 10 (9, 12)   | 0.67    | $-9.8 \times 10^{-4}$ (-0.0580, 0.056) | 1           |
| >45 & ≤65                                               | No. patients with data | 1710 (98%)   | 28 (97%)     | 0.48    |                                        |             |
|                                                         | Median (IQR)           | 10 (9, 11)   | 10 (9, 11)   | 0.29    | $8.6 \times 10^{-5}$ (-0.06, 0.06)     | 1           |
| ≤45                                                     | No. patients with data | 466 (99%)    | 10 (100%)    | 0.98    |                                        |             |
|                                                         | Median (IQR)           | 9 (8, 10)    | 11 (10, 11)  | 0.002   | 0.12 (0.008, 0.2)                      | 0.04        |

| <b>LV end diastolic diameter – mm</b> |                        |                |                |       |                         |      |
|---------------------------------------|------------------------|----------------|----------------|-------|-------------------------|------|
| >65                                   | No. patients with data | 1804 (99%)     | 36 (97%)       | 0.41  |                         |      |
|                                       | Median (IQR)           | 43 (40, 47)    | 43 (40, 46)    | 0.94  | 0.003 (-0.042, 0.048)   | 0.9  |
| >45 & <=65                            | No. patients with data | 1721 (98%)     | 29 (100%)      | 1     |                         |      |
|                                       | Median (IQR)           | 44 (41, 48)    | 44 (42, 46)    | 0.44  | -0.022 (-0.066, 0.023)  | 0.3  |
| <=45                                  | No. patients with data | 466 (99%)      | 10 (100%)      | 0.98  |                         |      |
|                                       | Median (IQR)           | 45 (42, 49)    | 44 (41, 46)    | 0.87  | -0.0011 (-0.069, 0.067) | 1    |
| <b>LV Mass – g</b>                    |                        |                |                |       |                         |      |
| >65                                   | No. patients with data | 1663 (91%)     | 32 (86%)       | 0.38  |                         |      |
|                                       | Median (IQR)           | 150 (110, 180) | 150 (120, 180) | 0.74  | 0.022 (-0.11, 0.15)     | 0.7  |
| >45 & <=65                            | No. patients with data | 1650 (94%)     | 26 (90%)       | 0.23  |                         |      |
|                                       | Median (IQR)           | 150 (120, 180) | 150 (130, 170) | 0.73  | -0.035 (-0.16, 0.091)   | 0.6  |
| <=45                                  | No. patients with data | 462 (98%)      | 8 (80%)        | 0.75  |                         |      |
|                                       | Median (IQR)           | 140 (110, 170) | 170 (150, 210) | 0.033 | 0.20 (-0.016, 0.42)     | 0.07 |

LV – left ventricular; IQR – interquartile range

\* Age, sex, and principal components (PC) 1-10 adjusted effect estimate (95% confidence interval), and p-value for the effect of *TTR* V122I carrier status on natural log transformed echo parameter

**eTable 14. Characteristics of TTR V122I Carriers With Heart Failure That Underwent Detailed Chart Review.**

|                                                                                                                                                                                                                                                                                                                                                                            | <b>TTR V122I Carriers with Heart Failure</b> |               |
|----------------------------------------------------------------------------------------------------------------------------------------------------------------------------------------------------------------------------------------------------------------------------------------------------------------------------------------------------------------------------|----------------------------------------------|---------------|
|                                                                                                                                                                                                                                                                                                                                                                            | <b>PMBB</b>                                  | <b>BioMe</b>  |
| Total — no.                                                                                                                                                                                                                                                                                                                                                                | 53                                           | 39            |
| Male — no. (%)                                                                                                                                                                                                                                                                                                                                                             | 40 (75%)                                     | 16 (41)       |
| Age — yrs; median (IQR)                                                                                                                                                                                                                                                                                                                                                    | 67 (59, 76)                                  | 71 (62, 81)   |
| BMI — kg/m <sup>2</sup> ; median (IQR)                                                                                                                                                                                                                                                                                                                                     | 27 (24, 32)                                  | 30 (25.2, 34) |
| Hypertension — no. (%)                                                                                                                                                                                                                                                                                                                                                     | 46 (86%)                                     | 33 (85%)      |
| Diabetes — no. (%)                                                                                                                                                                                                                                                                                                                                                         | 26 (49%)                                     | 29 (74%)      |
| Arrhythmias — no. (%)                                                                                                                                                                                                                                                                                                                                                      |                                              |               |
| Atrial fibrillation                                                                                                                                                                                                                                                                                                                                                        | 22 (42%)                                     | 12 (31%)      |
| Ventricular tachycardia                                                                                                                                                                                                                                                                                                                                                    | 7 (13%)                                      | 6 (15%)       |
| EKG abnormalities — no. (%)                                                                                                                                                                                                                                                                                                                                                |                                              |               |
| Low voltage                                                                                                                                                                                                                                                                                                                                                                | 7 (13%)                                      | 9 (23%)       |
| Conduction delays/block*                                                                                                                                                                                                                                                                                                                                                   | 9 (17%)                                      | 10 (26%)      |
| Pacemaker or ICD — no. (%)                                                                                                                                                                                                                                                                                                                                                 | 19 (36%)                                     | 11 (28%)      |
| LV ejection fraction — %; median (IQR)                                                                                                                                                                                                                                                                                                                                     | 40 (30, 60)                                  | 60 (44, 62)   |
| RV systolic dysfunction                                                                                                                                                                                                                                                                                                                                                    |                                              |               |
| Mild                                                                                                                                                                                                                                                                                                                                                                       | 10 (18%)                                     | 8 (21%)       |
| Moderate                                                                                                                                                                                                                                                                                                                                                                   | 7 (13%)                                      | 6 (15%)       |
| Severe                                                                                                                                                                                                                                                                                                                                                                     | 5 (9.4%)                                     | 2 (5%)        |
| Diastolic dysfunction — no. (%)                                                                                                                                                                                                                                                                                                                                            |                                              |               |
| Mild                                                                                                                                                                                                                                                                                                                                                                       | 16 (30%)                                     | 4 (10%)       |
| Moderate                                                                                                                                                                                                                                                                                                                                                                   | 5 (9.4%)                                     | 10 (26%)      |
| Severe                                                                                                                                                                                                                                                                                                                                                                     | 5 (9.5%)                                     | 2 (5%)        |
| IVSd — mm; median (IQR)                                                                                                                                                                                                                                                                                                                                                    | 12 (10, 16)                                  | 12 (10, 12)   |
| LVPWd — mm; median (IQR)                                                                                                                                                                                                                                                                                                                                                   | 11 (10, 14)                                  | 11 (10, 12)   |
| Ischemic cardiomyopathy — no. (%)                                                                                                                                                                                                                                                                                                                                          | 19 (36%)                                     | 6 (15%)       |
| Carpal tunnel syndrome — no. (%)                                                                                                                                                                                                                                                                                                                                           | 7 (13%)                                      | 6 (15%)       |
| Neuropathy — no. (%)                                                                                                                                                                                                                                                                                                                                                       | 16 (31%)                                     | 8 (21%)       |
| Diagnosed Amyloid — no. (%)                                                                                                                                                                                                                                                                                                                                                | 9 (17%)                                      | 1 (2.6%)      |
| <p>* Right bundle branch block, 1st degree atrioventricular block, hemiblock, non-specific interventricular block<br/>                     IQR – interquartile range; BMI – body mass index; EKG – Electrocardiogram; LV – Left Ventricular; RV – Right Ventricular; IVSd – Interventricular septum diastolic thickness; LVPWd – LV posterior wall diastolic thickness</p> |                                              |               |

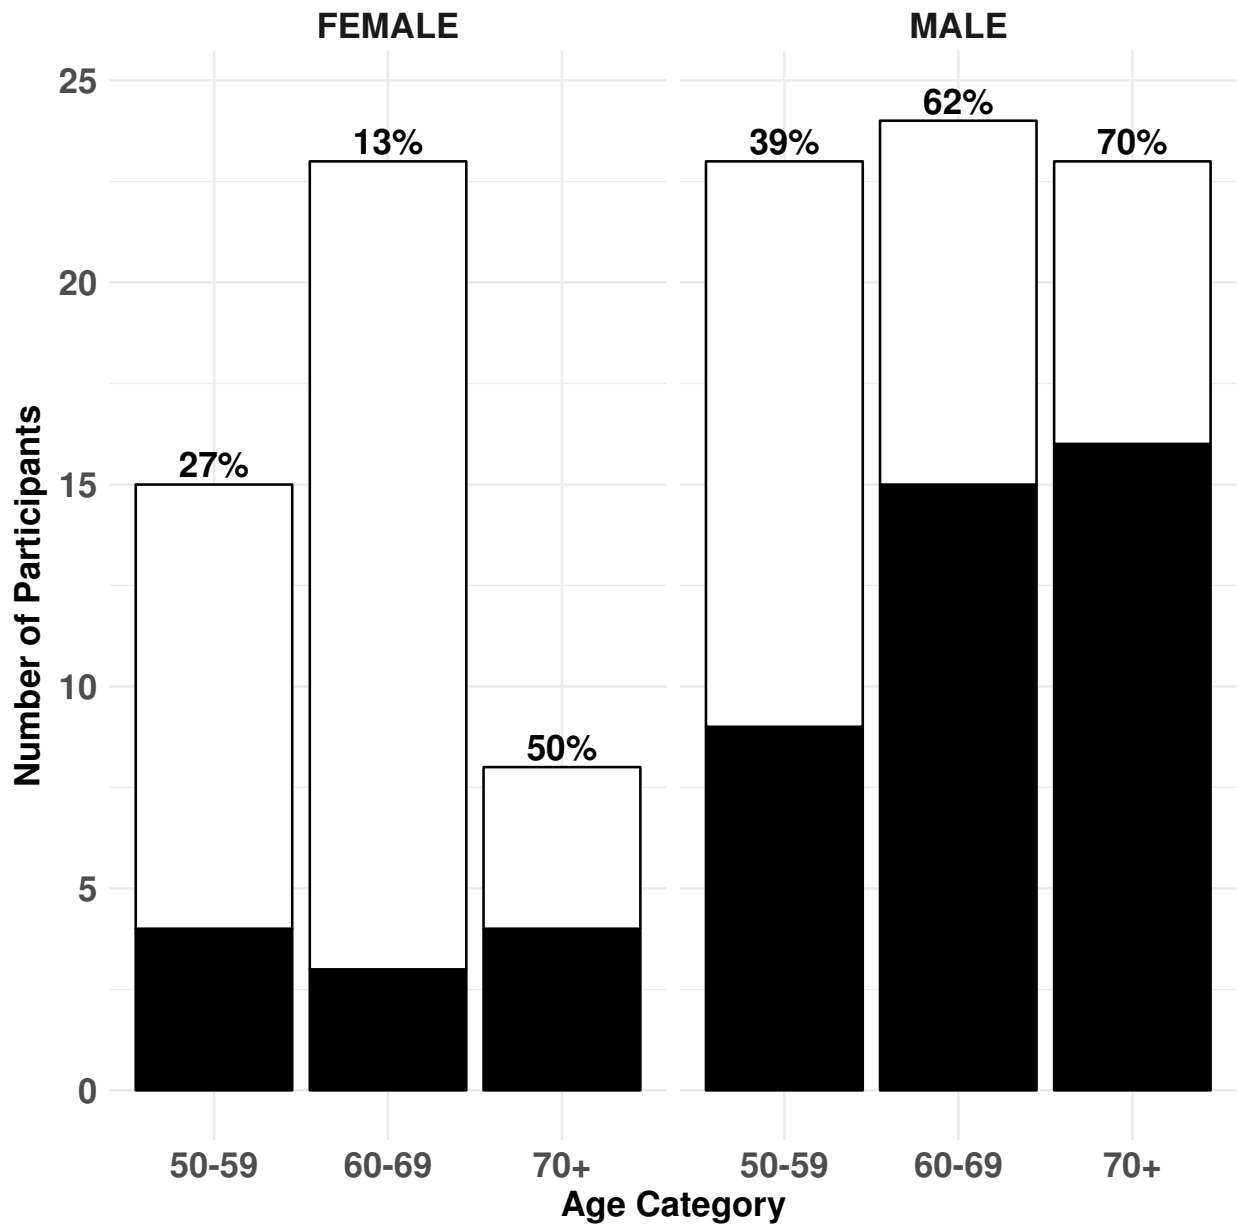

**eFigure 1. Prevalence of Clinically Diagnosed Heart Failure or Cardiomyopathy by Age and Sex in *TTR* V122I Carriers in PMBB.**



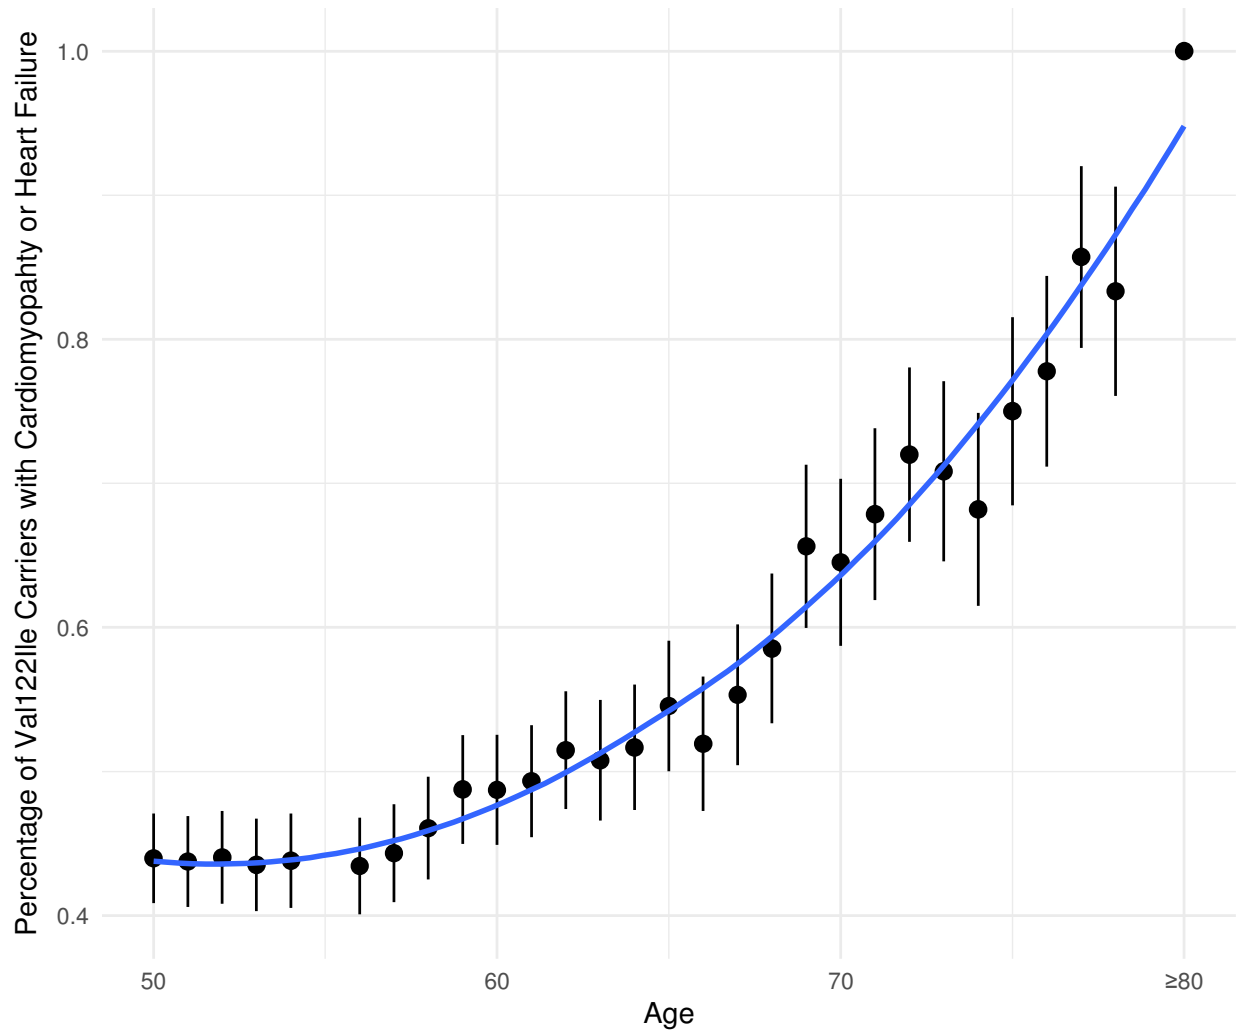

**eFigure 2. Cumulative Prevalence of Clinically Diagnosed Heart Failure or Cardiomyopathy by Age in *TTR* V122I Carriers in PMBB.** Each point represents the crude cumulative prevalence of cardiomyopathy or heart failure among *TTR* Val122Ile variant carriers of that age or older in the PMBB cohort. Error bars represent 95% confidence intervals for the crude cumulative prevalence. The blue line represents the loess regression line with associated 95% confidence interval of the regression in grey.

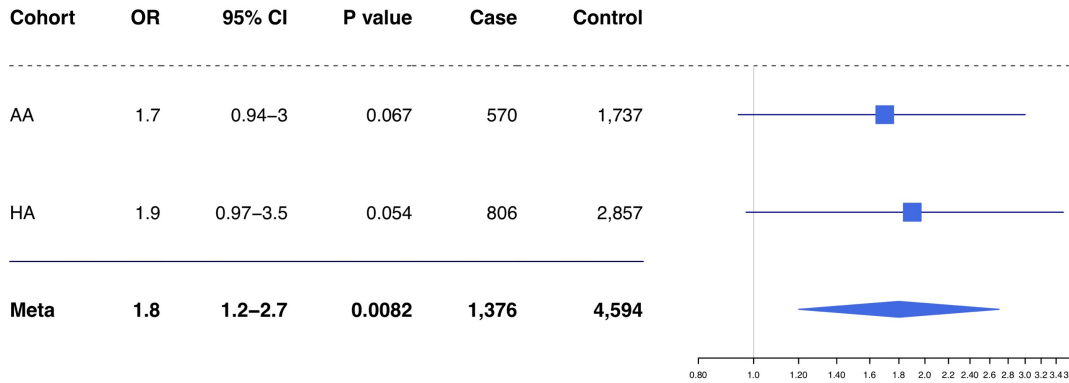

**eFigure 3. Ancestry-Specific Association of *TTR* V122I Carrier Status With Prevalent Heart Failure in BioMe.** Age-, sex- and genetic principal component-adjusted OR were calculated using logistic regression separately in African ancestry (AA) and Hispanic/Latino ancestry (HA) and combined using inverse variance weighted meta-analysis. The range in the panel on the right represents the 95% confidence intervals around the point estimates; OR – odds ratio; CI – confidence interval.

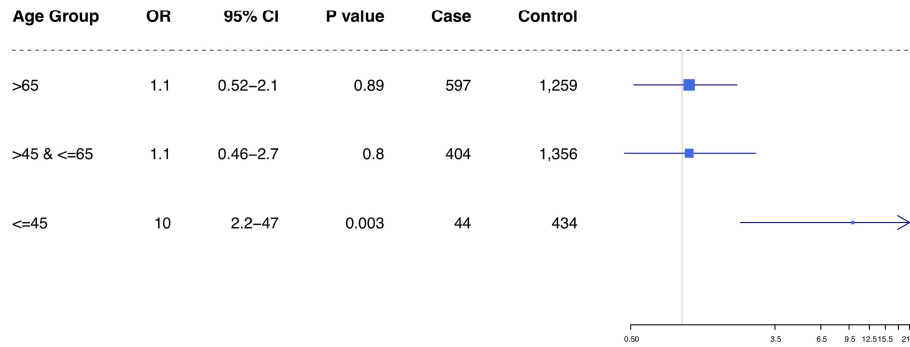

**eFigure 4. Genetic Association Results of Transthyretin (*TTR*) V122I on Left Ventricular Hypertrophy Among BioMe Participants Without Heart Failure.** OR – odds ratio; CI – confidence interval.

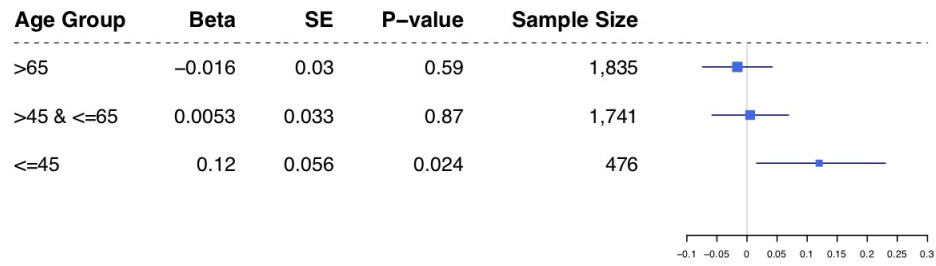

**eFigure 5. Genetic Association Results of Transthyretin (*TTR*) V122I on Diastolic Intraventricular Septal Thickness Among BioMe Participants Without Heart Failure. SE – standard error; CI – confidence interval.**
